# Supplementary material for: Multicentric Validation of Proteomic Biomarkers in Urine Specific for Diabetic Nephropathy
Source: PLoS One. 2010 Oct 20;5(10):e13421. doi: 10.1371/journal.pone.0013421 (PMC2958112; doi:10.1371/journal.pone.0013421)
Supplement: Table S4 — Rank correlation of the 65 previously defined urinary DN biomarkers [1]. Shown are the protein identification numbers (ID), the correlation with urinary albumin excretion (UAE) and with creatinine clearance (CrCl), respectively. The results of the correlation analysis include the significance level P and the Spearmann's coefficient rho. In the last column SwissProt names of the sequenced peptides are shown. All italic marked values indicate no significance. (0.02 MB XLS) [file pone.0013421.s005.xls]

## Sheet: Rank correlation
	Correlation with UAE		Correlation with CrCl
Protein ID	Spearman's coefficient of rank correlation (rho)	Significance level (P)	Spearman's coefficient of rank correlation (rho)	Significance level (P)	SwissProt name of sequenced peptide
5913	0.705	<0.0001	-0.218	0.0089
15216	0.247	0.003	-0.113	0.1746
17968	-0.202	0.0153	0.243	0.0035
27797	0.626	<0.0001	-0.282	0.0007
33209	-0.0704	0.3979	0.209	0.0121	CO3A1
38798	-0.193	0.0204	0.0532	0.5234	CO3A1
41513	-0.353	<0.0001	0.247	0.003	UROM
48751	-0.56	<0.0001	0.266	0.0014
49948	-0.446	<0.0001	0.164	0.049
49958	-0.394	<0.0001	0.12	0.15	PGRC1
56884	-0.655	<0.0001	0.467	<0.0001
66483	0.56	<0.0001	-0.274	0.001	FETUA
67386	-0.308	0.0002	0.2	0.0164	CO1A2
67632	0.782	<0.0001	-0.252	0.0025	A1AT
68316	0.76	<0.0001	-0.288	0.0006
68670	0.736	<0.0001	-0.195	0.0195	TTHY
70633	-0.0812	0.33	0.0571	0.4929	CO3A1
72343	0.701	<0.0001	-0.212	0.011
72896	-0.307	0.0002	0.107	0.1989	CO1A1
76415	-0.124	0.1381	0.256	0.0022	CO3A1
79626	-0.518	<0.0001	0.223	0.0075	CO1A1
79816	0.635	<0.0001	-0.162	0.0521
81424	0.682	<0.0001	-0.199	0.0172	A1AT
81457	-0.394	<0.0001	0.296	0.0004	CO1A1
83823	0.176	0.035	-0.0833	0.3175
85627	-0.0689	0.4087	0.0485	0.5609
86201	0.693	<0.0001	-0.135	0.1048
87223	0.71	<0.0001	-0.182	0.0292
90840	0.784	<0.0001	-0.255	0.0022	A1AT
91421	0.81	<0.0001	-0.262	0.0016	A1AT
91542	-0.51	<0.0001	0.402	<0.0001	CO1A1
92410	-0.507	<0.0001	0.449	<0.0001	CO1A1
92456	0.596	<0.0001	-0.178	0.033
92698	0.614	<0.0001	-0.324	0.0001	ALBU
92841	-0.226	0.0066	0.176	0.0342	CO1A1
94308	-0.386	<0.0001	0.221	0.0081	CO1A1
94948	-0.387	<0.0001	0.245	0.0032	CO1A1
95552	0.698	<0.0001	-0.17	0.0408
96370	0.746	<0.0001	-0.245	0.0033	A1AT
97301	0.705	<0.0001	-0.337	0.0001	ALBU
98485	-0.182	0.0294	0.208	0.0124
102392	0.715	<0.0001	-0.254	0.0023	ALBU
105105	-0.343	<0.0001	0.262	0.0017	CO1A1
106195	0.616	<0.0001	-0.401	<0.0001	B2MG
106558	0.7	<0.0001	-0.295	0.0004
107460	-0.583	<0.0001	0.488	<0.0001	CO3A1
109752	0.573	<0.0001	-0.296	0.0004
114823	-0.526	<0.0001	0.282	0.0007	CO1A1
118597	-0.428	<0.0001	0.253	0.0024	CD99
119292	-0.479	<0.0001	0.127	0.1269
121772	-0.184	0.0275	0.156	0.0609	CO1A2
121775	-0.504	<0.0001	0.279	0.0008	CO1A1
122400	-0.52	<0.0001	0.364	<0.0001	CO1A1
124172	-0.432	<0.0001	0.311	0.0002
127351	-0.575	<0.0001	0.269	0.0012	CO1A1
127899	-0.45	<0.0001	0.216	0.0096
130747	-0.425	<0.0001	0.197	0.0179
131294	-0.574	<0.0001	0.386	<0.0001
142080	-0.363	<0.0001	0.13	0.118
143652	-0.373	<0.0001	0.168	0.0434
145456	-0.132	0.1126	0.0347	0.6774
145793	-0.151	0.0694	0.207	0.0129
146936	-0.338	0.0001	0.242	0.0038
147541	-0.519	<0.0001	-0.0484	0.5616
148717	0.769	<0.0001	-0.218	0.009
